# Supplementary material
Source: MDPI journal article supplement (https://www.mdpi.com/2073-4441/9/3/222)
Supplement: s1 [file s1]

**Table S1.** Socio-economic and demographic profile of households.

| Variables                           | Household                         |      |
|-------------------------------------|-----------------------------------|------|
|                                     | N                                 | %    |
| <i>District</i>                     |                                   |      |
| Kathmandu                           | 862                               | 87.4 |
| Bhaktapur                           | 36                                | 3.7  |
| Lalitpur                            | 88                                | 8.9  |
| <i>Caste</i>                        |                                   |      |
| Brahmin                             | 236                               | 23.9 |
| Chettri                             | 135                               | 13.7 |
| Janajati                            | 609                               | 61.8 |
| Dalit                               | 1                                 | 0.1  |
| missing                             | 5                                 | 0.5  |
| <i>Respondents' Gender_Pre-GEQ</i>  |                                   |      |
| Female                              | 488                               | 49.5 |
| Male                                | 498                               | 50.5 |
| <i>Respondents' Gender_Post-GEQ</i> |                                   |      |
| Female                              | 475                               | 48.2 |
| Male                                | 511                               | 51.8 |
| <i>Ownership of house</i>           |                                   |      |
| Owner                               | 584                               | 59.2 |
| Tenants                             | 401                               | 40.7 |
| missing                             | 1                                 | 0.1  |
| <i>Monthly expenditure</i>          | <b>Mean (<math>\pm</math> SD)</b> |      |
| Pre-GEQ                             | US\$294 ( $\pm$ 165)              |      |
| Post-GEQ                            | US\$322 ( $\pm$ 178)              |      |

SD: Standard deviation; 1 U.S. dollar (US\$) = 109 Nepalese Rupees (NRs.) (as of 5 January 2017)

**Table S2.** Water sources that have a negative correlation with piped water across Kathmandu Upatyaka Khanepani Limited (KUKL) branches pre- and post-GEQ period.

| KUKL branches        | Water sources having negative <sup>#</sup> correlation* (p-value<0.05)<br>with piped water |                           |
|----------------------|--------------------------------------------------------------------------------------------|---------------------------|
|                      | Pre-GEQ                                                                                    | Post-GEQ                  |
| <b>Mahankalchaur</b> | Jar water                                                                                  | Groundwater,<br>Jar water |
| <b>Chettrapati</b>   | None                                                                                       | Jar water                 |
| <b>Kamaladi</b>      | Groundwater                                                                                | Jar water                 |
| <b>Tripureshowr</b>  | Tanker water                                                                               | Jar water                 |
| <b>Lalitpur</b>      | None                                                                                       | Tanker water              |
| <b>Madhyapur</b>     | None                                                                                       | Groundwater               |
| <b>Baneshowr</b>     | None                                                                                       | Groundwater,<br>Jar water |
| <b>Maharajgunj</b>   | None                                                                                       | None                      |
| <b>Kritipur</b>      | No piped water                                                                             |                           |

<sup>#</sup> positive correlation was observed in only one branch and does not match objective; \*  
Pearson correlation test was used to test correlation between consumption of piped water  
with that of other source.

**Table S3.** Groundwater, jar water, and tanker water consumption of households across different branches during pre- and post-GEQ periods; data and comparison.

| KUKL branches<br>(number of<br>households) | Source of<br>water | Pre-GEQ                                   | Post-GEQ    | Paired t-test<br>p-value |
|--------------------------------------------|--------------------|-------------------------------------------|-------------|--------------------------|
|                                            |                    | Amount in Litres (number of<br>household) |             |                          |
| Mahankaalchaur<br>(N=188)                  | Groundwater        | 123 (N=136)                               | 76 (N=145)  | .001                     |
|                                            | Jar water          | 13 (N=111)                                | 5 (N=112)   | <0.001                   |
|                                            | Tanker water       | 7(N=9)                                    | 0           | .004                     |
| Chettrapati (N=96)                         | Groundwater        | 158 (N=33)                                | 146 (N=41)  | .733                     |
|                                            | Jar water          | 18 (N=81)                                 | 15 (N=84)   | .126                     |
|                                            | Tanker water       | 91 (N=52)                                 | 345 (N=48)  | <0.001                   |
| Kamaladi (N=28)                            | Groundwater        | 129 (N=8)                                 | 34 (N=5)    | .093                     |
|                                            | Jar water          | 16 (N=21)                                 | 12 (N=18)   | .259                     |
|                                            | Tanker water       | 52 (N=8)                                  | 168 (N=7)   | .101                     |
| Tripureshowr (N=170)                       | Groundwater        | 291 (N=82)                                | 280 (N=126) | .828                     |
|                                            | Jar water          | 19 (N=112)                                | 14 (N=133)  | .002                     |
|                                            | Tanker water       | 107 (N=78)                                | 328 (N=69)  | .002                     |
| Lalitpur (N=88)                            | Groundwater        | 121 (N=36)                                | 147 (N=53)  | .394                     |
|                                            | Jar water          | 22 (N=74)                                 | 11(N=77)    | <0.001                   |
|                                            | Tanker water       | 74 (N=74)                                 | 370 (N=42)  | .002                     |
| Madhyapur (N=36)                           | Groundwater        | 14 (N=5)                                  | 10 (N=6)    | .799                     |
|                                            | Jar water          | 2 (N=29)                                  | 15(N=29)    | <0.001                   |
| Baneshowr (N = 293)                        | Groundwater        | 335 (N=181)                               | 248 (N=234) | .046                     |
|                                            | Jar water          | 14(N=216)                                 | 9 (N=223)   | <0.001                   |
|                                            | Tanker water       | 33 (N=44)                                 | 91 (N=28)   | .172                     |
| Maharajgunj (N = 57)                       | Groundwater        | 331 (N=36)                                | 223 (N=40)  | .037                     |
|                                            | Jar water          | 16 (N=46)                                 | 12 (N=51)   | .040                     |
|                                            | Tanker water       | 88 (N=34)                                 | 286 (N=22)  | .122                     |
| Kritipur (N = 30)                          | Groundwater        | 31 (N=9)                                  | 33 (N=30)   | .827                     |
|                                            | Jar water          | 33 (N=28)                                 | 13 (N=28)   | <0.001                   |

**Table S4.** Distribution of piped water, alternative water sources, and their combination to households.

| Water sources                        | Household % |          |
|--------------------------------------|-------------|----------|
|                                      | Pre-GEQ     | Post-GEQ |
| Piped water only                     | 0           | 0        |
| Piped + alternative<br>water sources | 63          | 66       |
| Alternative water<br>sources only    | 37          | 34       |
| Total                                | 100         | 100      |

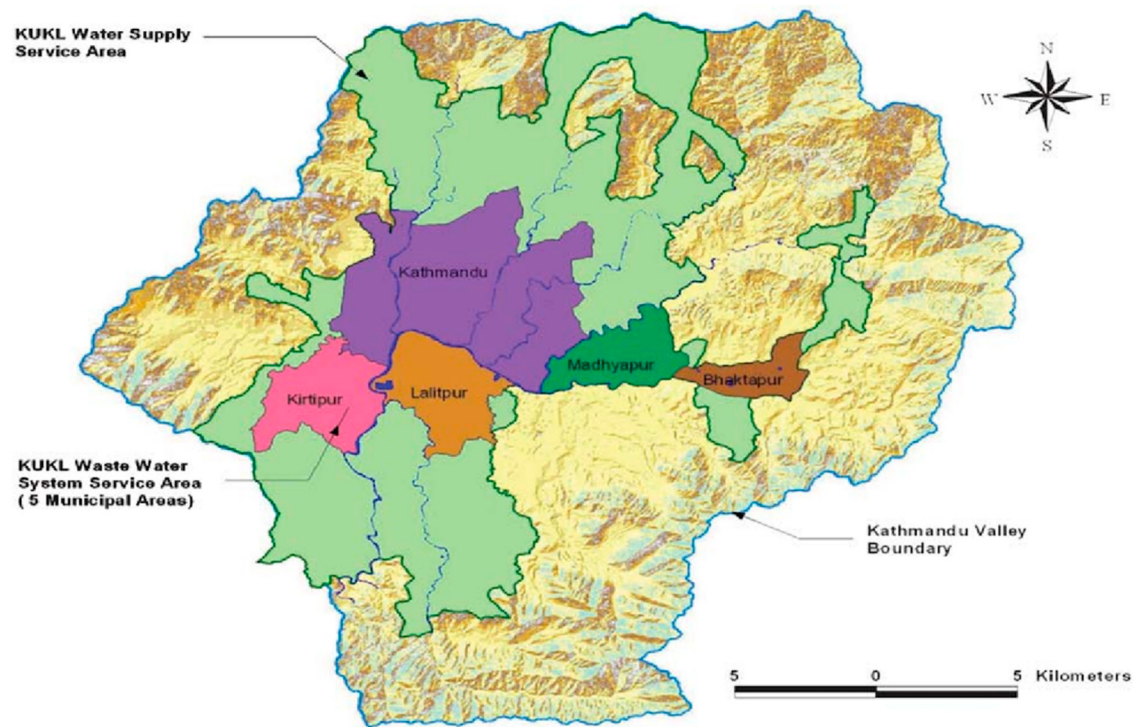

**Figure S1.** Kathmandu Upatyaka Khanepani Limited (KUKL) service areas (Source: KUKL 2015[1]).

#### References:

1. *Annual Report (Seventh Anniversary)*; Kathmandu Upatyaka Khanepani Limited: Kathmandu, Nepal, 2015.

## Questionnaire (English version)

(Note: This questionnaire is adapted according to the data used to prepare the manuscript.)

### 1. Personal Information

- (1) Name: ☐ Female ☐ Male  
 (2) Address: .....District .....Village .....Ward .....Tole  
 (3) Phone number: .....  
 (4) Age: .....Year  
 (5) Ethnicity: ☐ Bramhan ☐ Chettri ☐ Janajati ☐ Dalit ☐ Other ( ) ☐ Don't want to disclose  
 (6) Are you the owner of the house? ☐ Owner ☐ Tenant  
 (7) How many households in the house? \_\_\_\_\_ households  
 (8) How many persons in your family? \_\_\_\_\_ persons  
 (9) Please tell us about your household members.

| S.N. | A. Member's position                     | B. Last educational attainment  | C. Occupation           |
|------|------------------------------------------|---------------------------------|-------------------------|
| 1.   | Household head                           | Illiterate                      | Agriculture             |
| 2.   | Household's wife/husband                 | No formal school                | Business                |
| 3.   | Father/Mother of household head or wife  | Primary school (1-5 classes)    | Skilled manual labour   |
| 4.   | Child of household head                  | Lower secondary (6-8 classes)   | Unskilled manual labour |
| 5.   | Brother/Sister of household head or wife | Secondary (9-10 classes)        | Service                 |
| 6.   | Others.....                              | Upper secondary (10-12 classes) | Remittance              |
| 7.   |                                          | College/ University             | Student                 |
| 8.   |                                          | Do not want to disclose         | Other                   |

| <input type="checkbox"/> for interviewee | Member position <sup>A)</sup> | Age | Sex (M/F) | Last educational attainment <sup>B)</sup> | Occupation <sup>C)</sup> |
|------------------------------------------|-------------------------------|-----|-----------|-------------------------------------------|--------------------------|
| 1 <input type="checkbox"/>               |                               |     |           |                                           |                          |
| 2 <input type="checkbox"/>               |                               |     |           |                                           |                          |
| 3 <input type="checkbox"/>               |                               |     |           |                                           |                          |
| 4 <input type="checkbox"/>               |                               |     |           |                                           |                          |
| 5 <input type="checkbox"/>               |                               |     |           |                                           |                          |

### 2. Your household water system

7. Does your house connect piped water?

☐ YES ☐ NO → Go to Q13

8. For how many hours does the piped water supply the house, per day or per week?

( ) Hours ☐ per Day , ☐ per Week

9. Do you store piped water in your house?

- ☐ No, I do not  
☐ Yes, I store it in: ☐ Tank on the roof ☐ Tank underground  
☐ Vessels ☐ Other ( )

10. What amount of piped water do you consume in a day/week/month?

( ) Liters ☐ per Day ☐ per Week ☐ per Month

11. What do you use piped water for? Please tick all that apply.

- ☐ Drinking ☐ Cooking ☐ Bathing ☐ Laundry ☐ Cleaning  
☐ Gardening ☐ Other (Specify )

12. How much do you pay for your piped water supply in a day/week/month?

( ) NPR ☐ per Day, ☐ per Week, ☐ per Month

13. Do you have a well in your yard/compound?

- ☐ YES ☐ YES, but dried → [Go to Q17](#) ☐ NO → [Go to Q17](#)

14. What amount of well water do you consume in a day/week/month?

( ) Liters ☐ per Day ☐ per Week ☐ per Month

15. Do you store well water in your house?

- ☐ No, I do not  
☐ Yes, I store it in: ☐ Tank on the roof ☐ Tank under the floor  
☐ Vessels ☐ Other ( )

16. What is the purpose of using water from well? Please tick all that apply.

- ☐ Drinking ☐ Cooking ☐ Bathing ☐ Laundry ☐ Cleaning  
☐ Gardening ☐ Other (Specify )

17. Do you collect rain water for domestic use?

- ☐ YES ☐ NO → [Go to Q21](#)

18. What amount of rain water do you consume in a day/week/month?

( ) Liters ☐ per Day ☐ per Week ☐ per Month

19. Do you store rain water in your house?

- ☐ No, I do not  
☐ Yes, I store it in: ☐ Tank on the roof ☐ Tank under the floor  
☐ Vessels ☐ Other ( )

20. What is the purpose of using rain water? Please tick all that apply.

- ☐ Drinking ☐ Cooking ☐ Bathing ☐ Laundry ☐ Cleaning  
☐ Gardening ☐ Other (Specify )

21. Does your family buy water for domestic use? If yes, how frequently and how much do you pay each time?

☐ YES ☐ No → Go to Q22

| Source               | Frequency                                                                                                                            | Payment             | Purpose                                                                                                                                                                                                                                                         |
|----------------------|--------------------------------------------------------------------------------------------------------------------------------------|---------------------|-----------------------------------------------------------------------------------------------------------------------------------------------------------------------------------------------------------------------------------------------------------------|
| Bottled or Jar water | <input type="checkbox"/> Everyday<br><input type="checkbox"/> (    )times per week<br><input type="checkbox"/> (    )times per month | (    ) NPR/per time | <input type="checkbox"/> Drinking <input type="checkbox"/> Cooking <input type="checkbox"/> Bathing<br><input type="checkbox"/> Laundry <input type="checkbox"/> Cleaning<br><input type="checkbox"/> Gardening<br><input type="checkbox"/> Other (Specify    ) |
| Tanker-truck         | <input type="checkbox"/> Everyday<br><input type="checkbox"/> (    )times per week<br><input type="checkbox"/> (    )times per month | (    ) NPR/per time | <input type="checkbox"/> Drinking <input type="checkbox"/> Cooking <input type="checkbox"/> Bathing<br><input type="checkbox"/> Laundry <input type="checkbox"/> Cleaning<br><input type="checkbox"/> Gardening<br><input type="checkbox"/> Other (Specify    ) |

22. Do you collect the water? How much water and how many times do you collect water in a day/week/month? Why do you collect the water? Please tick all that apply.

| Source                                           | Litre | Times | Per                                                                                             | Purpose                                                                                                                                                                                                                                                      |
|--------------------------------------------------|-------|-------|-------------------------------------------------------------------------------------------------|--------------------------------------------------------------------------------------------------------------------------------------------------------------------------------------------------------------------------------------------------------------|
| <input type="checkbox"/> Neighbour's piped water |       |       | <input type="checkbox"/> Day<br><input type="checkbox"/> Week<br><input type="checkbox"/> Month | <input type="checkbox"/> Drinking <input type="checkbox"/> Cooking <input type="checkbox"/> Bathing<br><input type="checkbox"/> Laundry <input type="checkbox"/> Cleaning <input type="checkbox"/> Gardening<br><input type="checkbox"/> Other (Specify    ) |
| <input type="checkbox"/> Neighbour's well        |       |       | <input type="checkbox"/> Day<br><input type="checkbox"/> Week<br><input type="checkbox"/> Month | <input type="checkbox"/> Drinking <input type="checkbox"/> Cooking <input type="checkbox"/> Bathing<br><input type="checkbox"/> Laundry <input type="checkbox"/> Cleaning <input type="checkbox"/> Gardening<br><input type="checkbox"/> Other (Specify    ) |
| <input type="checkbox"/> Tanker-truck            |       |       | <input type="checkbox"/> Day<br><input type="checkbox"/> Week<br><input type="checkbox"/> Month | <input type="checkbox"/> Drinking <input type="checkbox"/> Cooking <input type="checkbox"/> Bathing<br><input type="checkbox"/> Laundry <input type="checkbox"/> Cleaning <input type="checkbox"/> Gardening<br><input type="checkbox"/> Other (Specify    ) |
| <input type="checkbox"/> River/Lake/ Ponds       |       |       | <input type="checkbox"/> Day<br><input type="checkbox"/> Week<br><input type="checkbox"/> Month | <input type="checkbox"/> Drinking <input type="checkbox"/> Cooking <input type="checkbox"/> Bathing<br><input type="checkbox"/> Laundry <input type="checkbox"/> Cleaning <input type="checkbox"/> Gardening<br><input type="checkbox"/> Other (Specify    ) |
| <input type="checkbox"/> Bottled or Jar water    |       |       | <input type="checkbox"/> Day<br><input type="checkbox"/> Week<br><input type="checkbox"/> Month | <input type="checkbox"/> Drinking <input type="checkbox"/> Cooking <input type="checkbox"/> Bathing<br><input type="checkbox"/> Laundry <input type="checkbox"/> Cleaning <input type="checkbox"/> Gardening<br><input type="checkbox"/> Other (Specify    ) |
| <input type="checkbox"/> Public well             |       |       | <input type="checkbox"/> Day<br><input type="checkbox"/> Week<br><input type="checkbox"/> Month | <input type="checkbox"/> Drinking <input type="checkbox"/> Cooking <input type="checkbox"/> Bathing<br><input type="checkbox"/> Laundry <input type="checkbox"/> Cleaning <input type="checkbox"/> Gardening<br><input type="checkbox"/> Other (Specify    ) |

|                                      |  |  |                                                                                                 |                                                                                                                                                                                                                                                           |
|--------------------------------------|--|--|-------------------------------------------------------------------------------------------------|-----------------------------------------------------------------------------------------------------------------------------------------------------------------------------------------------------------------------------------------------------------|
| <input type="checkbox"/> Stone spout |  |  | <input type="checkbox"/> Day<br><input type="checkbox"/> Week<br><input type="checkbox"/> Month | <input type="checkbox"/> Drinking <input type="checkbox"/> Cooking <input type="checkbox"/> Bathing<br><input type="checkbox"/> Laundry <input type="checkbox"/> Cleaning <input type="checkbox"/> Gardening<br><input type="checkbox"/> Other (Specify ) |
|--------------------------------------|--|--|-------------------------------------------------------------------------------------------------|-----------------------------------------------------------------------------------------------------------------------------------------------------------------------------------------------------------------------------------------------------------|

### 3. Economic status of household

23. In your household, what do you have?

|                  |                                                          |                |                                                          |
|------------------|----------------------------------------------------------|----------------|----------------------------------------------------------|
| Electricity      | <input type="checkbox"/> YES <input type="checkbox"/> NO | Radio          | <input type="checkbox"/> YES <input type="checkbox"/> NO |
| Television       | <input type="checkbox"/> YES <input type="checkbox"/> NO | Mobile phone   | <input type="checkbox"/> YES <input type="checkbox"/> NO |
| Land phone       | <input type="checkbox"/> YES <input type="checkbox"/> NO | Refrigerator   | <input type="checkbox"/> YES <input type="checkbox"/> NO |
| Bicycle          | <input type="checkbox"/> YES <input type="checkbox"/> NO | Motor bike     | <input type="checkbox"/> YES <input type="checkbox"/> NO |
| Car              | <input type="checkbox"/> YES <input type="checkbox"/> NO | Computer       | <input type="checkbox"/> YES <input type="checkbox"/> NO |
| Fan              | <input type="checkbox"/> YES <input type="checkbox"/> NO | Kerosene stove | <input type="checkbox"/> YES <input type="checkbox"/> NO |
| Electric stove   | <input type="checkbox"/> YES <input type="checkbox"/> NO | Gas stove      | <input type="checkbox"/> YES <input type="checkbox"/> NO |
| Domestic servant | <input type="checkbox"/> YES <input type="checkbox"/> NO | Invertor       | <input type="checkbox"/> YES <input type="checkbox"/> NO |

24. How much did you pay in the last month? ( ) NRP/month.

Thank you very much for your cooperation!

ID no. ....

Name of interviewer: ..... Date of interview: .....
